# Supplementary material for: Albuminuria as a Predictor of Cardiovascular Outcomes in Patients With Acute Myocardial Infarction
Source: PubMed Central journal article supplement — J Am Heart Assoc. 2019 Apr 5;8(8):e010546. doi: 10.1161/JAHA.118.010546 (PMC6507197; doi:10.1161/jaha.118.010546), 2019-04-05

**Table S1.** Baseline characteristics by sample

|                                    | Overall      | Those who have only ACR | Those who have ACR and Dipstick (Not imputed) | Those who have Dipstick but not ACR (Imputed) | Dipstick (Main analysis) |
|------------------------------------|--------------|-------------------------|-----------------------------------------------|-----------------------------------------------|--------------------------|
| <b>N</b>                           | 23,674       | 724                     | 427                                           | 2,042                                         | 2,469                    |
| <b>Demographic</b>                 |              |                         |                                               |                                               |                          |
| Age, years                         | 63.2 (13.4)  | 62.4 (11.6)             | 63.0 (11.7)                                   | 65.6 (12.0)                                   | 65.2 (12.0)              |
| Men                                | 59.3%        | 66.8%                   | 65.3%                                         | 50.9%                                         | 53.4%                    |
| <b>Comorbidities</b>               |              |                         |                                               |                                               |                          |
| Heart failure                      | 30.0%        | 35.1%                   | 41.1%                                         | 34.2%                                         | 35.2%                    |
| Hypertension                       | 54.9%        | 75.9%                   | 82.9%                                         | 63.3%                                         | 66.7%                    |
| Diabetes                           | 22.0%        | 72.2%                   | 61.9%                                         | 26.0%                                         | 32.0%                    |
| Prior stroke                       | 11.6%        | 14.9%                   | 14.1%                                         | 13.0%                                         | 13.2%                    |
| Coronary artery bypass graft       | 2.9%         | 5.7%                    | 4.9%                                          | 3.0%                                          | 3.2%                     |
| Peripheral artery disease          | 7.7%         | 14.4%                   | 16.2%                                         | 10.6%                                         | 11.5%                    |
| <b>Kidney measures</b>             |              |                         |                                               |                                               |                          |
| eGFR, ml/min/1.73m <sup>2</sup>    | 72.8 (26.6)* | 67.3 (28.1)             | 49.1 (31.6)                                   | 68.6 (26.7)                                   | 65.2 (28.6)              |
| eGFR <60 ml/min/1.73m <sup>2</sup> | 31.5%        | 41.9%                   | 65.6%                                         | 37.0%                                         | 42.0%                    |
| Log ACR                            | 3.9 (1.9)    | 3.6 (1.8)               | 4.6 (2.0)                                     | 3.5 (1.3) †                                   | 4.6 (2.0)                |
| Dipstick proteinuria, mg/dL        |              |                         |                                               |                                               |                          |
| <30                                | 67.8%        | NA                      | 46.6%                                         | 72.2%                                         | 67.8%                    |
| 30-100                             | 15.1%        | NA                      | 18.3%                                         | 14.4%                                         | 15.0%                    |
| 101-300                            | 10.8%        | NA                      | 19.0%                                         | 9.1%                                          | 10.8%                    |
| >300                               | 6.4%         | NA                      | 16.2%                                         | 4.4%                                          | 6.4%                     |
| <b>Medication uses</b>             |              |                         |                                               |                                               |                          |
| Aspirin                            | 79.4%        | 83.8%                   | 77.5%                                         | 79.0%                                         | 78.7%                    |
| Thienopyridine                     | 51.7%        | 55.3%                   | 45.4%                                         | 47.8%                                         | 47.4%                    |
| β-Blocker                          | 78.3%        | 83.7%                   | 83.4%                                         | 77.4%                                         | 78.4%                    |
| ACEi or ARB                        | 62.1%        | 84.1%                   | 77.3%                                         | 62.7%                                         | 65.2%                    |
| Statin                             | 64.1%        | 75.7%                   | 64.4%                                         | 60.9%                                         | 61.5%                    |
| <b>Outcomes</b>                    |              |                         |                                               |                                               |                          |
| Composite outcome                  | 55.3%        | 63.1%                   | 72.6%                                         | 63.5%                                         | 65.1%                    |
| All-cause mortality                | 41.3%        | 42.1%                   | 56.7%                                         | 48.0%                                         | 49.5%                    |
| Cardiovascular mortality           | 20.0%        | 18.3%                   | 28.6%                                         | 21.9%                                         | 23.1%                    |
| Heart failure                      | 26.1%        | 36.7%                   | 36.5%                                         | 31.2%                                         | 32.2%                    |
| Recurrent MI                       | 11.8%        | 14.9%                   | 17.6%                                         | 15.7%                                         | 16.0%                    |
| Ischemic stroke                    | 6.3%         | 6.8%                    | 5.6%                                          | 7.1%                                          | 6.8%                     |

ACEi: angiotensin-converting-enzyme inhibitor; ACR: albumin-to-creatinine ratio; ARB: angiotensin II receptor blockers; eGFR: estimated glomerular filtration rate; NA: not available

*Note:* Values for categorical variables are given as percentage; values for continuous variables are given as mean (standard deviation)

\*Of 23,674 participants, 21,303 had eGFR values.

**Table S2.** Definition of covariates

|                              |                                                                                                                                                                                                                                                |
|------------------------------|------------------------------------------------------------------------------------------------------------------------------------------------------------------------------------------------------------------------------------------------|
| <b>Comorbidities</b>         |                                                                                                                                                                                                                                                |
| Heart failure                | ICD-10 codes I50                                                                                                                                                                                                                               |
| Hypertension                 | ICD-10 codes I10-I15                                                                                                                                                                                                                           |
| Diabetes                     | ICD-10 codes E10, E11, E13                                                                                                                                                                                                                     |
| Stroke                       | ICD-10 codes I61-I63                                                                                                                                                                                                                           |
| Coronary artery bypass graft | NOMESCO classification FNA, FNB, FNC, FND, FNE                                                                                                                                                                                                 |
| Peripheral artery disease    | ICD-10 codes I70.2x or I70.92,<br>leg revascularization: NOMESCO classification PDE30, PDF30, PDH, PDP30<br>PDQ30 PEE, PEF, PEH, PEN, PEQ, PFE, PFH, PFN10, PFP, PFQ, PFW99, PGH,<br>leg amputation: NOMESCO classification NFQ19, NGQ19, NHQ1 |
| eGFR                         | 1 year prior to MI                                                                                                                                                                                                                             |
| <b>Medication uses</b>       |                                                                                                                                                                                                                                                |
| Aspirin                      | ATC codes B01AC06                                                                                                                                                                                                                              |
| Thienopyridine               | ATC codes ATC codes B01AC04, B01AC05, B01AC22                                                                                                                                                                                                  |
| $\beta$ -Blocker             | ATC codes C07                                                                                                                                                                                                                                  |
| ACEi or ARB                  | ATC codes C09A, C09B, C09C, C09D                                                                                                                                                                                                               |
| Statin                       | ATC codes C10A                                                                                                                                                                                                                                 |

ATC codes, Anatomical, Therapeutic, Chemical classification system codes; ICD-10 codes, International Classification of Disease-Tenth Edition diagnostic codes; NOMESCO classification: Nordic Medico-Statistical Committee classification

**Table S3.** Adjusted hazard ratios (95% CI)\* of adverse outcomes after index MI by continuous albumin-to-creatinine ratio (ACR) and diabetes status

|                                 | <b>8-fold ACR</b>  |                          |
|---------------------------------|--------------------|--------------------------|
|                                 | <b>HR (95% CI)</b> | <b>P for interaction</b> |
| <b>Composite outcome†</b>       |                    |                          |
| Non-diabetes                    | 1.24 (1.09-1.40)   | 0.558                    |
| Diabetes                        | 1.15 (1.00-1.32)   |                          |
| <b>All-cause mortality</b>      |                    |                          |
| Non-diabetes                    | 1.25 (1.11-1.40)   | 0.815                    |
| Diabetes                        | 1.15 (0.99-1.33)   |                          |
| <b>Cardiovascular mortality</b> |                    |                          |
| Non-diabetes                    | 1.19 (1.01-1.41)   | 0.625                    |
| Diabetes                        | 1.22 (0.99-1.51)   |                          |
| <b>Heart failure</b>            |                    |                          |
| Non-diabetes                    | 1.23 (1.04-1.45)   | 0.987                    |
| Diabetes                        | 1.19 (1.01-1.40)   |                          |
| <b>Recurrent MI</b>             |                    |                          |
| Non-diabetes                    | 1.27 (1.03-1.56)   | 0.614                    |
| Diabetes                        | 1.16 (0.90-1.49)   |                          |
| <b>Ischemic stroke</b>          |                    |                          |
| Non-diabetes                    | 1.14 (0.87-1.49)   | 0.969                    |
| Diabetes                        | 1.27 (0.86-1.89)   |                          |

ACR: albumin-creatinine ratio; HR: hazard ratio

\* Adjusted for age (continuous), heart failure, hypertension, diabetes, stroke, coronary artery bypass graft, peripheral artery disease and eGFR (continuous)

† All-cause mortality, cardiovascular mortality, heart failure, recurrent MI, or ischemic stroke

**Table S4.** Model performance measures with the addition of albumin-to-creatinine ratio (ACR) to TRS2°P variables after excluding those who died within 14 days after hospitalized MI

|                                 | <b>C statistic (95% CI)</b> | <b>Δ C statistic (95% CI)</b> | <b>NRI, categorical (95% CI)</b> |
|---------------------------------|-----------------------------|-------------------------------|----------------------------------|
| <b>Composite outcome*</b>       |                             |                               |                                  |
| Conventional risk factors       | 0.690 (0.672, 0.708)        |                               |                                  |
| +ACR                            | 0.713 (0.696, 0.730)        | 0.023 (0.016, 0.031)          | 0.036 (0.013, 0.060)             |
| <b>All-cause mortality</b>      |                             |                               |                                  |
| Conventional risk factors       | 0.728 (0.705, 0.750)        |                               |                                  |
| +ACR                            | 0.746 (0.724, 0.768)        | 0.018 (0.012, 0.024)          | 0.045 (0.016, 0.075)             |
| <b>Cardiovascular mortality</b> |                             |                               |                                  |
| Conventional risk factors       | 0.768 (0.738, 0.799)        |                               |                                  |
| +ACR                            | 0.780 (0.750, 0.818)        | 0.011 (0.006, 0.017)          | 0.064 (0.008, 0.120)             |
| <b>Heart failure</b>            |                             |                               |                                  |
| Conventional risk factors       | 0.696 (0.674, 0.719)        |                               |                                  |
| +ACR                            | 0.750 (0.728, 0.772)        | 0.054 (0.039, 0.068)          | 0.014 (-0.007, 0.034)            |
| <b>Recurrent MI</b>             |                             |                               |                                  |
| Conventional risk factors       | 0.609 (0.574, 0.644)        |                               |                                  |
| +ACR                            | 0.656 (0.621, 0.691)        | 0.047 (0.020, 0.074)          | -                                |
| <b>Ischemic stroke</b>          |                             |                               |                                  |
| Conventional risk factors       | 0.720 (0.666, 0.774)        |                               |                                  |
| +ACR                            | 0.725 (0.672, 0.778)        | 0.005 (-0.002, 0.012)         | -                                |

ACR: albumin-to-creatinine ratio; NRI: net reclassification index

*Note:* All prediction statistics were based on 1-year predicted risk. Conventional risk factors were age (continuous), heart failure, hypertension, diabetes, stroke, coronary artery bypass graft, peripheral artery disease and eGFR (continuous). For individual outcomes, we restricted the analysis of categorical NRI to major individual outcomes, all-cause mortality, cardiovascular mortality, and heart failure, due to small number of events.

\* All-cause mortality, cardiovascular mortality, heart failure, recurrent MI, or ischemic stroke

**Table S5.** Crude incidence rate (per 100 person-years) and adjusted hazard ratios (95% CI)\* of adverse outcomes after index MI by dipstick proteinuria (N=2,469)

|                                 | <b>Dipstick proteinuria, mg/dL</b> |                  |                  |                  |                    |
|---------------------------------|------------------------------------|------------------|------------------|------------------|--------------------|
|                                 | <b>&lt;30</b>                      | <b>30-100</b>    | <b>101-300</b>   | <b>&gt;300</b>   | <b>P for trend</b> |
|                                 | <b>N=1,673</b>                     | <b>N=371</b>     | <b>N=261</b>     | <b>N=158</b>     |                    |
| <b>Composite outcome†</b>       |                                    |                  |                  |                  |                    |
| Rate                            | 30.8                               | 48.9             | 65.0             | 74.9             |                    |
| HR (95% CI)                     | 1.0                                | 1.21 (1.05-1.38) | 1.24 (1.06-1.45) | 1.19 (0.98-1.44) | 0.002              |
| <b>All-cause mortality</b>      |                                    |                  |                  |                  |                    |
| Rate                            | 16.1                               | 23.4             | 38.6             | 31.9             |                    |
| HR (95% CI)                     | 1.0                                | 1.21 (1.03-1.41) | 1.61 (1.36-1.91) | 1.25 (1.01-1.55) | <0.001             |
| <b>Cardiovascular mortality</b> |                                    |                  |                  |                  |                    |
| Rate                            | 7.1                                | 11.4             | 20.4             | 15.3             |                    |
| HR (95% CI)                     | 1.0                                | 1.27 (1.01-1.59) | 1.70 (1.34-2.15) | 1.22 (0.90-1.67) | 0.001              |
| <b>Heart failure</b>            |                                    |                  |                  |                  |                    |
| Rate                            | 13.9                               | 20.4             | 25.7             | 34.7             |                    |
| HR (95% CI)                     | 1.0                                | 1.10 (0.90-1.33) | 1.10 (0.87-1.39) | 1.31 (1.02-1.69) | 0.037              |
| <b>Recurrent MI</b>             |                                    |                  |                  |                  |                    |
| Rate                            | 6.1                                | 8.6              | 10.8             | 14.2             |                    |
| HR (95% CI)                     | 1.0                                | 1.19 (0.90-1.57) | 1.19 (0.86-1.65) | 1.42 (0.98-2.04) | 0.039              |
| <b>Ischemic stroke</b>          |                                    |                  |                  |                  |                    |
| Rate                            | 2.5                                | 4.0              | 3.1              | 4.1              |                    |
| HR (95% CI)                     | 1.0                                | 1.42 (0.96-2.12) | 0.91 (0.52-1.61) | 1.23 (0.67-2.25) | 0.499              |

HR: hazard ratio

\* Adjusted for age (continuous), heart failure, hypertension, diabetes, stroke, coronary artery bypass graft, peripheral artery disease and eGFR (continuous)

† All-cause mortality, cardiovascular mortality, heart failure, recurrent MI, or ischemic stroke

**Table S6.** Model performance measures with the addition of dipstick proteinuria to conventional risk factors

|                                 | <b>C statistic (95% CI)</b> | <b>Δ C statistic (95% CI)</b> | <b>NRI, categorical (95% CI)</b> |
|---------------------------------|-----------------------------|-------------------------------|----------------------------------|
| <b>Composite outcomes*</b>      |                             |                               |                                  |
| Conventional risk factors       | 0.664 (0.649, 0.680)        |                               |                                  |
| +Dipstick proteinuria           | 0.680 (0.665, 0.696)        | 0.016 (0.009, 0.024)          | 0.008 (-0.008, 0.023)            |
| <b>All-cause mortality</b>      |                             |                               |                                  |
| Conventional risk factors       | 0.694 (0.675, 0.713)        |                               |                                  |
| +Dipstick proteinuria           | 0.712 (0.694, 0.731)        | 0.019 (0.012, 0.025)          | 0.021 (-0.001, 0.042)            |
| <b>Cardiovascular mortality</b> |                             |                               |                                  |
| Conventional risk factors       | 0.721 (0.698, 0.744)        |                               |                                  |
| +Dipstick proteinuria           | 0.739 (0.716, 0.761)        | 0.018 (0.011, 0.024)          | 0.003 (-0.028, 0.035)            |
| <b>Heart failure</b>            |                             |                               |                                  |
| Conventional risk factors       | 0.701 (0.680, 0.721)        |                               |                                  |
| +Dipstick proteinuria           | 0.713 (0.692, 0.734)        | 0.013 (0.002, 0.023)          | 0.001 (-0.013, 0.016)            |
| <b>Recurrent MI</b>             |                             |                               |                                  |
| Conventional risk factors       | 0.565 (0.530, 0.600)        |                               |                                  |
| +Dipstick proteinuria           | 0.613 (0.578, 0.647)        | 0.048 (0.027, 0.068)          | -                                |
| <b>Ischemic stroke</b>          |                             |                               |                                  |
| Conventional risk factors       | 0.780 (0.736, 0.824)        |                               |                                  |
| +Dipstick proteinuria           | 0.785 (0.741, 0.828)        | 0.005 (-0.004, 0.013)         | -                                |

NRI: net reclassification index

*Note:* All prediction statistics were based on 1-year predicted risk. Conventional risk factors were age (continuous), heart failure, hypertension, diabetes, stroke, coronary artery bypass graft, peripheral artery disease and eGFR (continuous)

\* All-cause mortality, cardiovascular mortality, heart failure, recurrent MI, or ischemic stroke

**Table S7.** Adjusted hazard ratios (95% CI)\* of adverse outcomes after index MI by continuous urine albumin-to-creatinine ratio (ACR) among those who have ACR data (N=1,151)

|                          | <b>8-fold ACR</b>  |
|--------------------------|--------------------|
|                          | <b>HR (95% CI)</b> |
| Composite outcome†       | 1.20 (1.10-1.31)   |
| All-cause mortality      | 1.32 (1.18-1.46)   |
| Cardiovascular mortality | 1.33 (1.14-1.56)   |
| Heart failure            | 1.23 (1.10-1.39)   |
| Recurrent MI             | 1.29 (1.08-1.55)   |
| Ischemic stroke          | 1.28 (0.97-1.68)   |

ACR: albumin-creatinine ratio; HR: hazard ratio

\* Adjusted for age (continuous), heart failure, hypertension, diabetes, stroke, coronary artery bypass graft, peripheral artery disease and eGFR (continuous)

† All-cause mortality, cardiovascular mortality, heart failure, recurrent MI, or ischemic stroke

**Table S8.** Crude incidence rate (100 person years) and adjusted hazard ratios (95%CI)\* of adverse outcome after index MI by urine albumin-to-creatinine ratio (ACR) among those who have ACR data (N=1,151)

|                          | ACR, mg/g |                  |                  |                  |             |
|--------------------------|-----------|------------------|------------------|------------------|-------------|
|                          | <10       | 10-29            | 30-299           | ≥300             | P for trend |
| Composite outcome†       |           |                  |                  |                  |             |
| Rate                     | 23.3      | 40.0             | 55.0             | 101.4            |             |
| HR (95% CI)              | 1.0       | 1.31 (1.03-1.67) | 1.48 (1.18-1.85) | 1.65 (1.30-2.14) | <0.001      |
| All-cause mortality      |           |                  |                  |                  |             |
| Rate                     | 10.1      | 17.3             | 24.7             | 43.8             |             |
| HR (95% CI)              | 1.0       | 1.21 (0.89-1.65) | 1.50 (1.13-2.00) | 2.17 (1.58-2.99) | <0.001      |
| Cardiovascular mortality |           |                  |                  |                  |             |
| Rate                     | 3.5       | 9.3              | 11.8             | 19.7             |             |
| HR (95% CI)              | 1.0       | 1.90 (1.17-3.10) | 1.96 (1.23-3.12) | 2.59 (1.55-4.32) | 0.001       |
| Heart failure            |           |                  |                  |                  |             |
| Rate                     | 12.0      | 18.5             | 28.5             | 48.9             |             |
| HR (95% CI)              | 1.0       | 1.25 (0.91-1.74) | 1.44 (1.07-1.94) | 1.59 (1.13-2.25) | 0.005       |
| Recurrent MI             |           |                  |                  |                  |             |
| Rate                     | 4.3       | 6.8              | 9.8              | 14.4             |             |
| HR (95% CI)              | 1.0       | 1.32 (0.79-2.18) | 1.60 (1.01-2.54) | 1.80 (1.05-3.09) | 0.021       |
| Ischemic stroke          |           |                  |                  |                  |             |
| Rate                     | 1.8       | 2.4              | 3.9              | 4.4              |             |
| HR (95% CI)              | 1.0       | 1.15 (0.53-2.53) | 1.59 (0.79-3.20) | 1.35 (0.57-3.18) | 0.302       |

ACR: albumin-creatinine ratio; HR: hazard ratio

\* Adjusted for age (continuous), heart failure, hypertension, diabetes, stroke, coronary artery bypass graft, peripheral artery disease and eGFR (continuous)

† All-cause mortality, cardiovascular mortality, heart failure, recurrent MI, or ischemic stroke



**Table S9.** Model performance measures with the addition of albumin-creatinine ratio (ACR) to conventional risk factors among those who have ACR data (N=1,151)

|                                 | <b>C statistic (95% CI)</b> | <b>Δ C statistic (95% CI)</b> | <b>NRI, categorical (95% CI)</b> |
|---------------------------------|-----------------------------|-------------------------------|----------------------------------|
| <b>Composite outcomes*</b>      |                             |                               |                                  |
| Conventional risk factors       | 0.680 (0.659, 0.702)        |                               |                                  |
| +ACR                            | 0.683 (0.662, 0.705)        | 0.003 (-0.001, 0.008)         | 0.039 (0.006, 0.072)             |
| <b>All-cause mortality</b>      |                             |                               |                                  |
| Conventional risk factors       | 0.712 (0.684, 0.740)        |                               |                                  |
| +ACR                            | 0.716 (0.688, 0.745)        | 0.004 (-0.004, 0.012)         | 0.035 (-0.005, 0.075)            |
| <b>Cardiovascular mortality</b> |                             |                               |                                  |
| Conventional risk factors       | 0.731 (0.695, 0.768)        |                               |                                  |
| +ACR                            | 0.733 (0.698, 0.769)        | 0.002 (-0.008, 0.012)         | 0.024 (-0.034, 0.082)            |
| <b>Heart failure</b>            |                             |                               |                                  |
| Conventional risk factors       | 0.701 (0.672, 0.730)        |                               |                                  |
| +ACR                            | 0.706 (0.677, 0.734)        | 0.004 (-0.001, 0.010)         | 0.035 (0.001, 0.068)             |
| <b>Recurrent MI</b>             |                             |                               |                                  |
| Conventional risk factors       | 0.687 (0.641, 0.733)        |                               |                                  |
| +ACR                            | 0.691 (0.646, 0.737)        | 0.005 (-0.010, 0.020)         | -                                |
| <b>Ischemic stroke</b>          |                             |                               |                                  |
| Conventional risk factors       | 0.795 (0.722, 0.867)        |                               |                                  |
| +ACR                            | 0.808 (0.740, 0.876)        | 0.013 (-0.001, 0.032)         | -                                |

ACR: albumin-creatinine ratio; NRI: net reclassification index

*Note:* All prediction statistics were based on 1-year predicted risk. Conventional risk factors were age (continuous), heart failure, hypertension, diabetes, stroke, coronary artery bypass graft, peripheral artery disease and eGFR (continuous)

\* All-cause mortality, cardiovascular mortality, heart failure, recurrent MI, or ischemic stroke

**Figure S1.** Study population

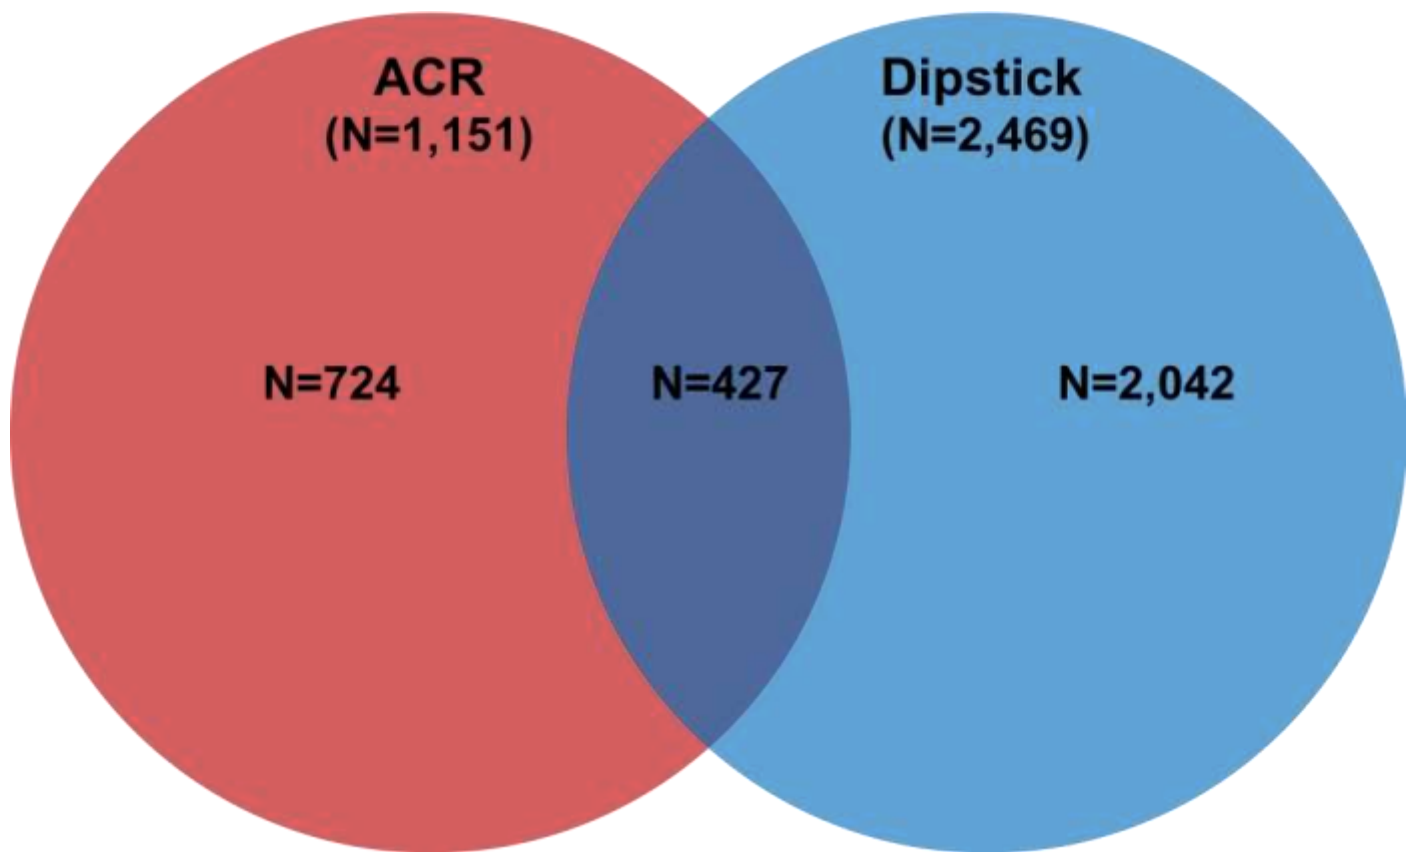

**Figure S2.** 1-year probability of adverse outcomes by decile of 1-year risk with the addition of urine albumin-to-creatinine ratio (ACR) to conventional risk factors

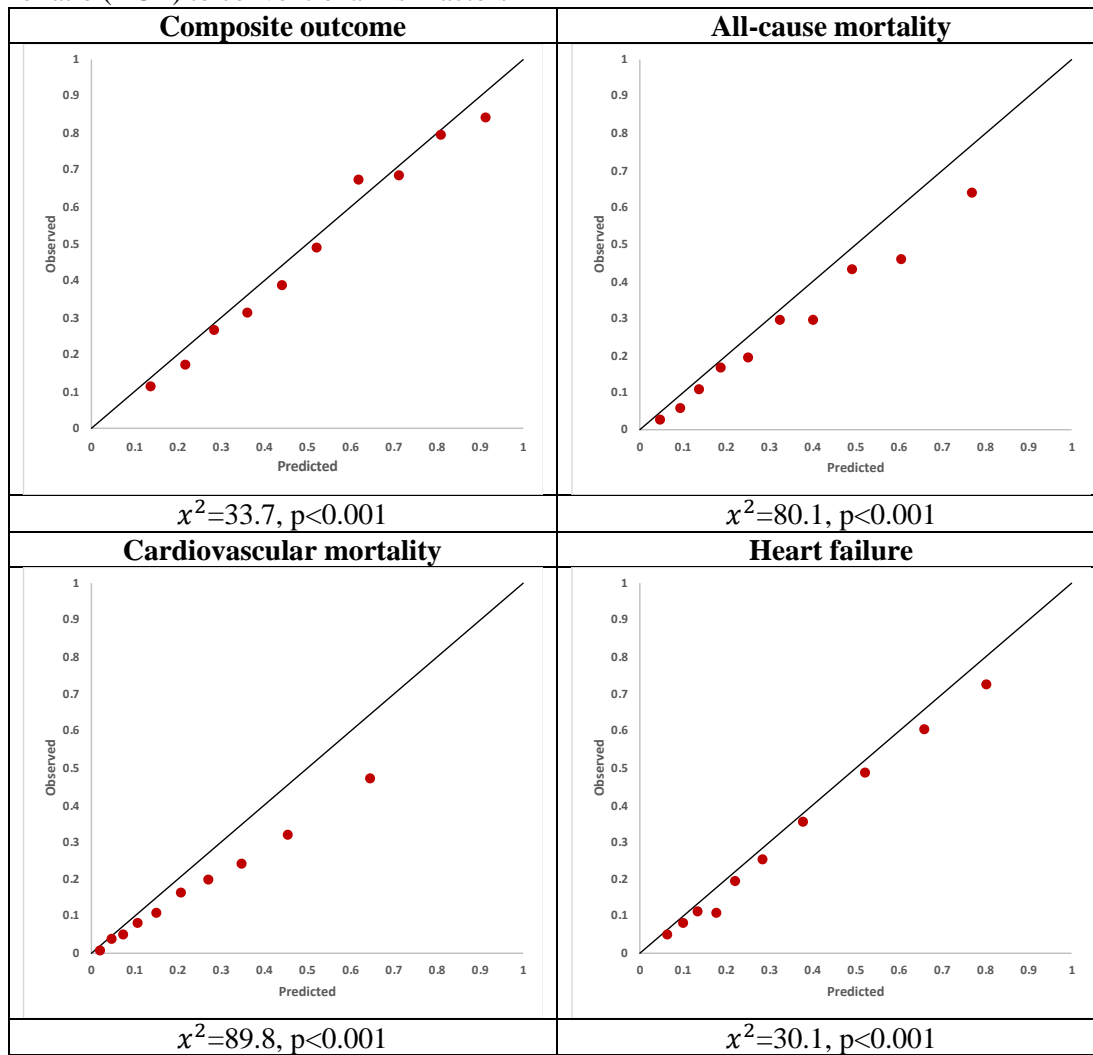

**Figure S3.** Adjusted hazard ratios of composite outcome after index MI by linear splines of urine albumin-to-creatinine ratio (ACR) with three knots (10, 30, and 300 mg/g) in those who have ACR data

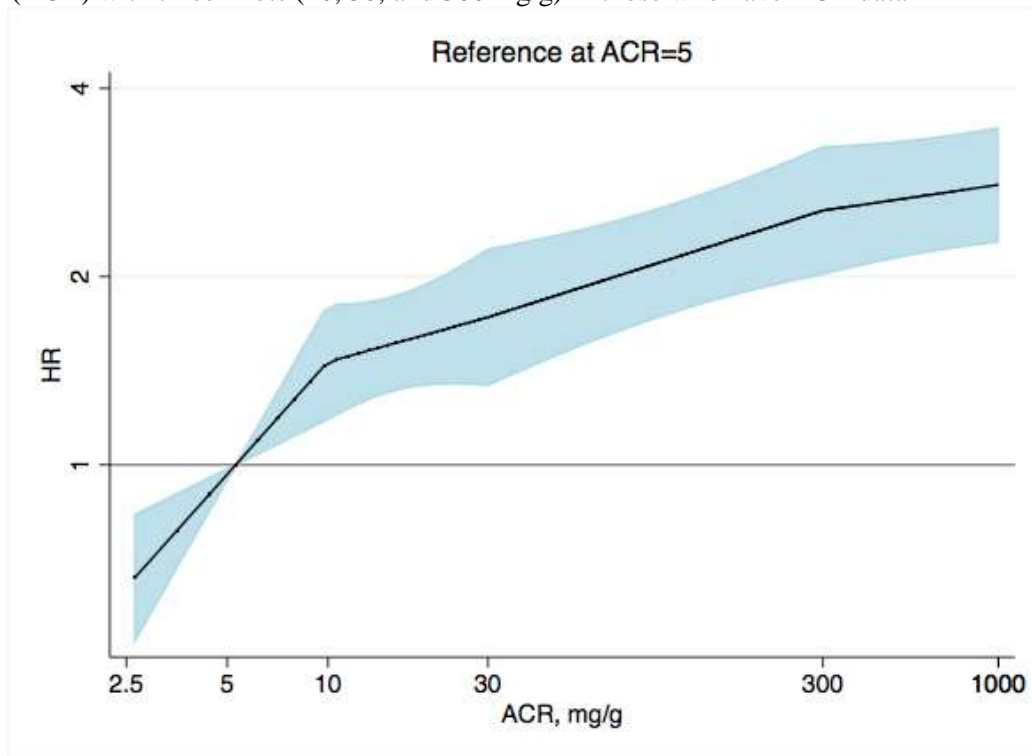

**Figure S4.** Adjusted hazard ratios of composite outcome after index MI by linear splines of converted urine albumin-to-creatinine ratio (ACR) with three knots (10, 30, and 300 mg/g)

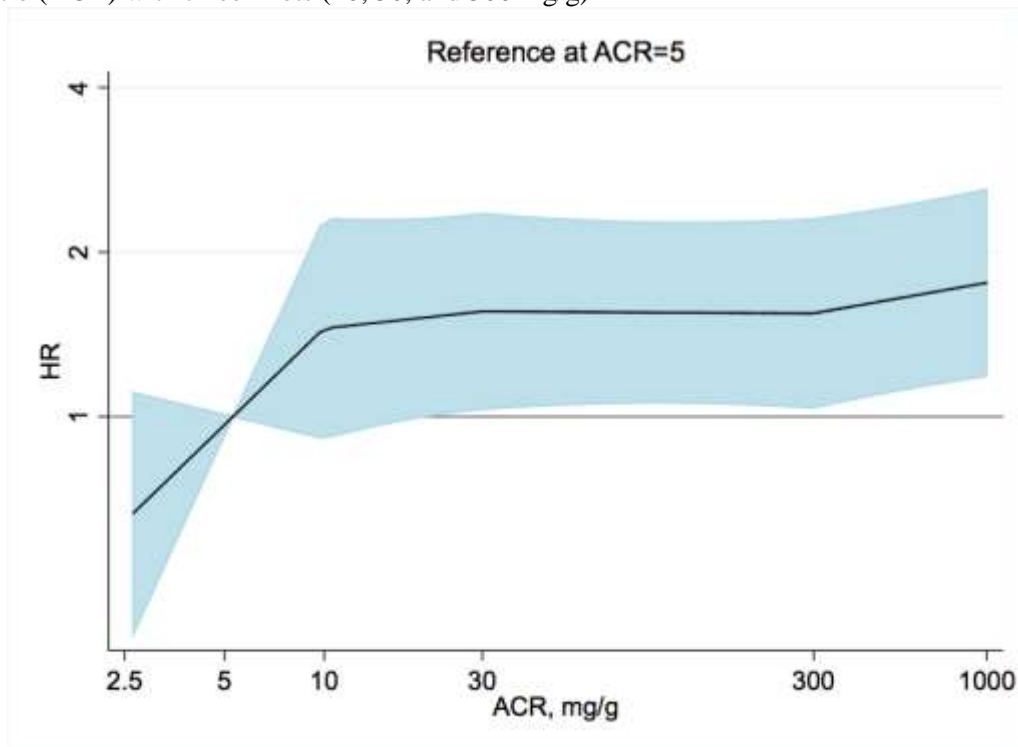

Supplement: JAH3-8-e010546-s001.pdf [file JAH3-8-e010546-s001.pdf]
